# Supplementary material for: Growth mechanism of C60/mesitylene nanowires
Source: Royal Society of Chemistry journal article supplement (doi:10.1039/c1ce05721a), 2011-12-13
Supplement: c1ce05721a.pdf [file c1ce05721a.pdf]

## Supporting Information

### Growth mechanism of C<sub>60</sub>/mesitylene nanowires

*Yuning Zhou and Wuzong Zhou*

EaStCHEM, School of Chemistry, University of St Andrews, St Andrews, Fife KY16

9ST, United Kingdom.

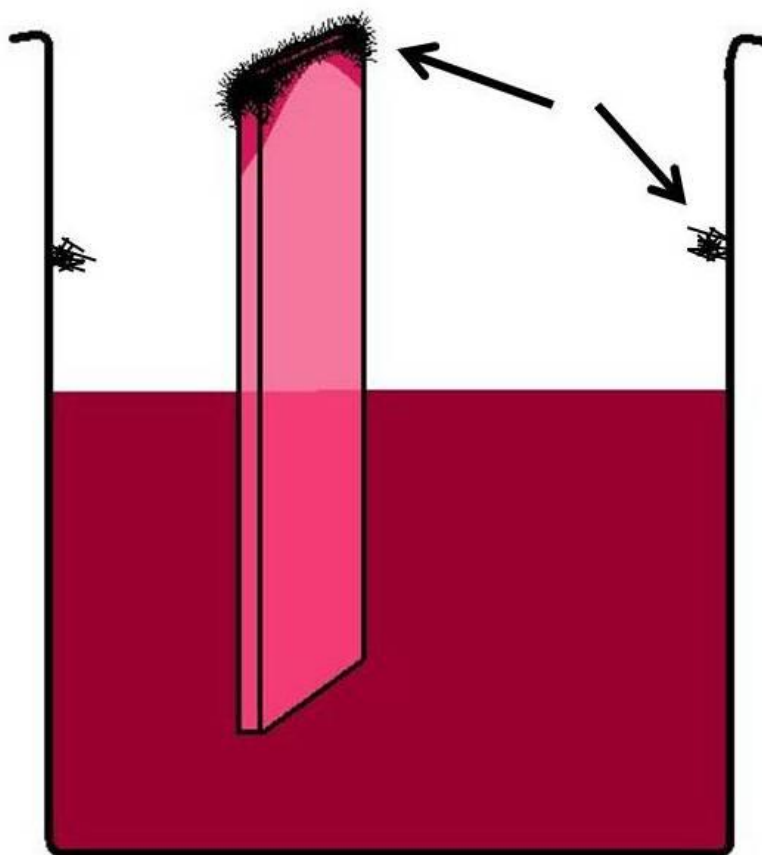

**Fig. S1.** Schematic diagram of experimental setup with a paper card in the C<sub>60</sub>/mesitylene or C<sub>60</sub>/p-xylene solution. Nanowires are collected from the top of the card and beaker wall as indicated by the arrows.

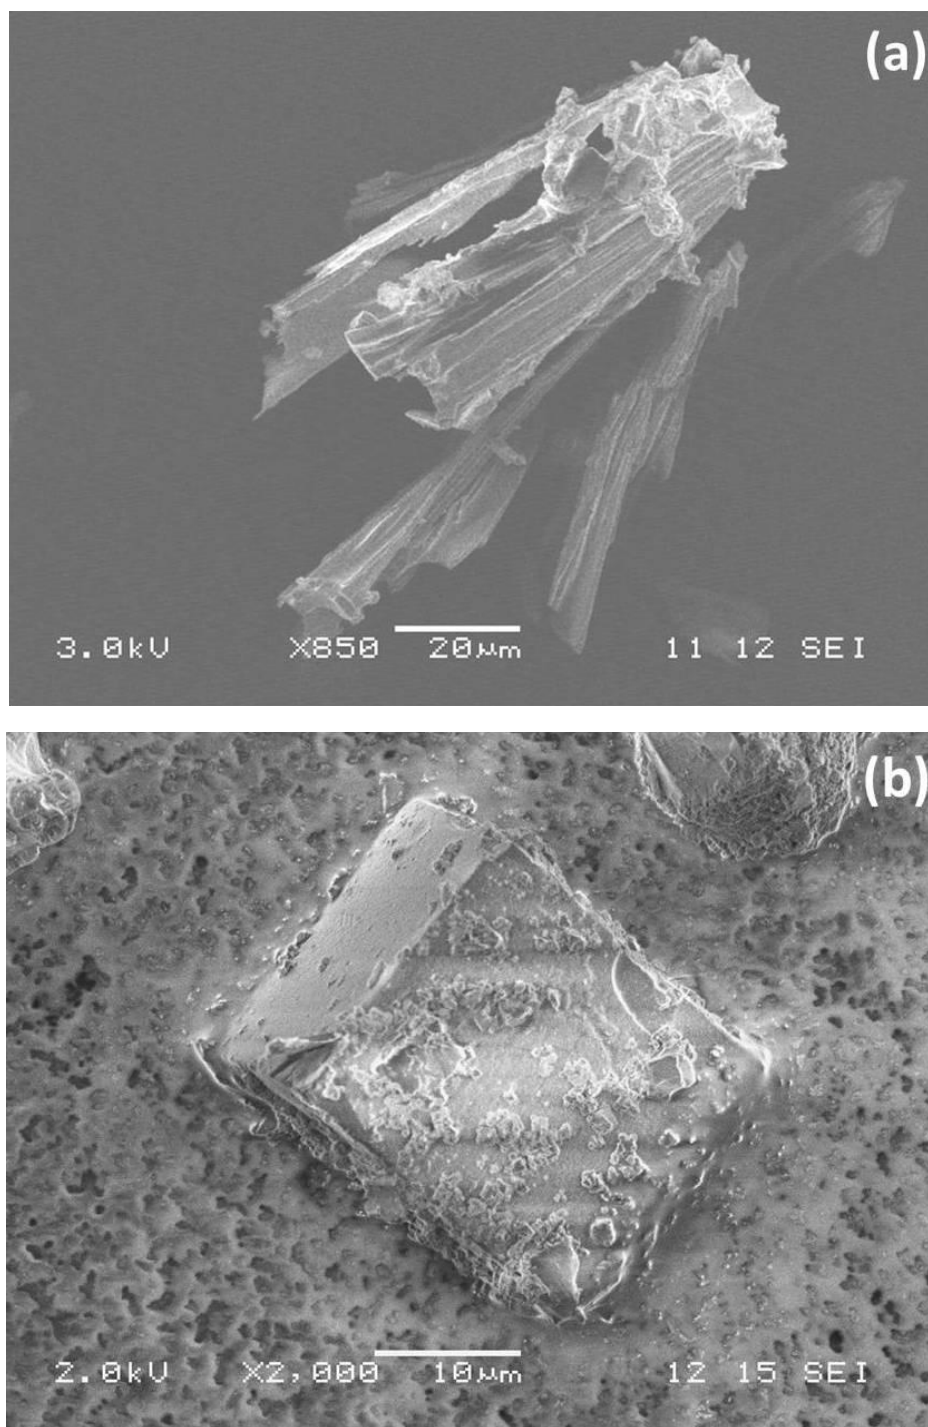

**Fig. S2.** SEM images of the crystals collected from beaker bottom, (a) from  $C_{60}$ /mesitylene and (b) from  $C_{60}$ /p-xylene.

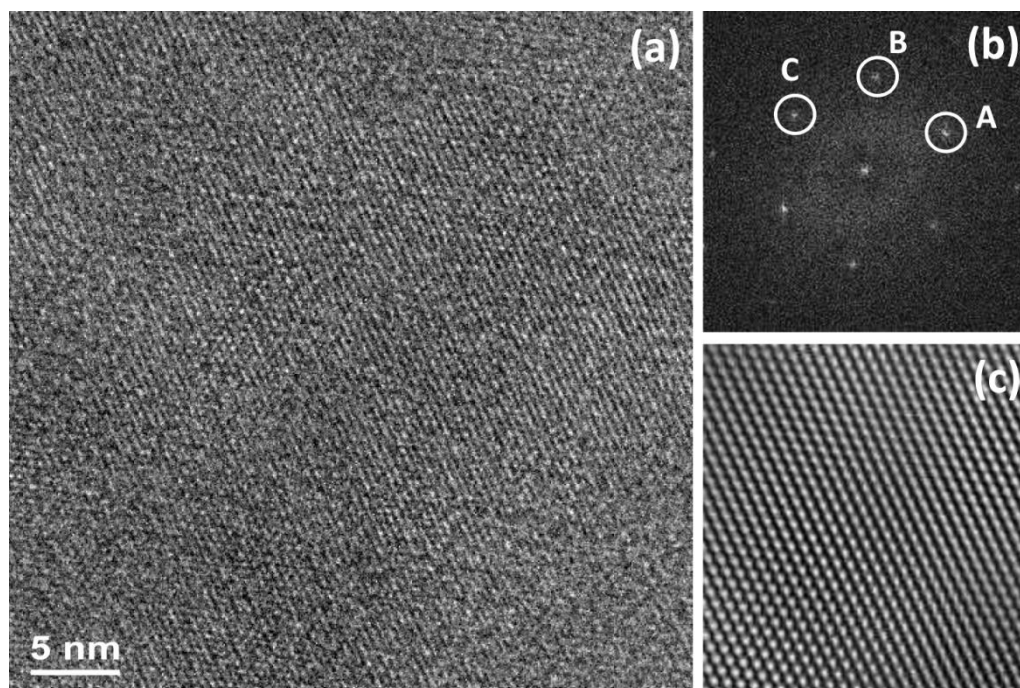

**Fig. S3.** (a) HRTEM image of a crystal collected from a solution of  $C_{60}$ /p-xylene, viewed down the  $[\bar{1}\bar{1}3]$  zone axis of an orthorhombic unit cell with  $a = 1.430$ ,  $b = 0.999$  and  $c = 1.006$  nm. (b) The corresponding FFT pattern. The d-spacings measured are 0.4305 (A), 0.4100 (B) and 0.4324 (C) nm, which can be indexed to  $(30\bar{1})$ ,  $(220)$  and  $(\bar{1}21)$ , respectively. The interplane angle between  $(30\bar{1})$  and  $(220)$  is measured to be  $58.64^\circ$ .
